# Supplementary material
Source: PubMed Central journal article supplement (PMC4854546)
Supplement: kepi-11-03-1145330-s001.pdf [file kepi-11-03-1145330-s001.pdf]

**Figure S1:** Methylation level of the CGI overlapping a retrocopy plotted against the methylation level of the surrounding region containing at least one repeat 1000 bp upstream and downstream of the retrocopy.

**Figure S2:** Methylation level of the CGI overlapping a retrocopy plotted against the methylation level of the surrounding region containing no repeat 1000 bp upstream and downstream of the retrocopy.

**Figure S3:** Methylation level of the CGI overlapping a retrocopy plotted against the methylation level of the surrounding region containing at least one repeat 1000 bp downstream of the retrocopy.

**Figure S4:** Methylation level of the CGI overlapping a retrocopy plotted against the methylation level of the surrounding region containing at least one repeat 1000 bp upstream of the retrocopy.

**Figure S5-S21:** IGV screenshots of 17 differentially methylated CGIs (methylome 1).

**Figure S22:** Expression analysis of IGF2BP3 in placenta of different trimester of pregnancy

**Table S1:** Classification of CGIs overlapping retrogenes

**Table S2:** Expression level of retrogenes overlapping a CGI as classified by the UCSC browser

**Table S3:** Genomic location of retrogenes overlapping a CGI according to RefSeq genes

**Table S4:** Genomic location of retrogenes overlapping a CGI according to RefSeq genes according to their expression level

**Table S5:** Expression level of intergenic retrogenes overlapping a CGI according to their methylation level

**Table S6:** Expression level of intragenic retrogenes overlapping a CGI according to their methylation level

**Table S7:** CGI methylation levels in other tissues

**Table S8:** Primer sequences for genomic sequence analysis

**Table S9:** Primer sequences for deep bisulfite sequencing (universal tags in bold)

**Table S10:** Primer sequences for RNA analysis

**Table S11:** Detailed description of the analyzed 17 RO-CGIs

**Table S12:** Row data of SNaPshot analysis

## **Interpretation of Phred Quality Score**

### **Strategy of genomic primer design**

### **Strategy of bisulfite primer design**

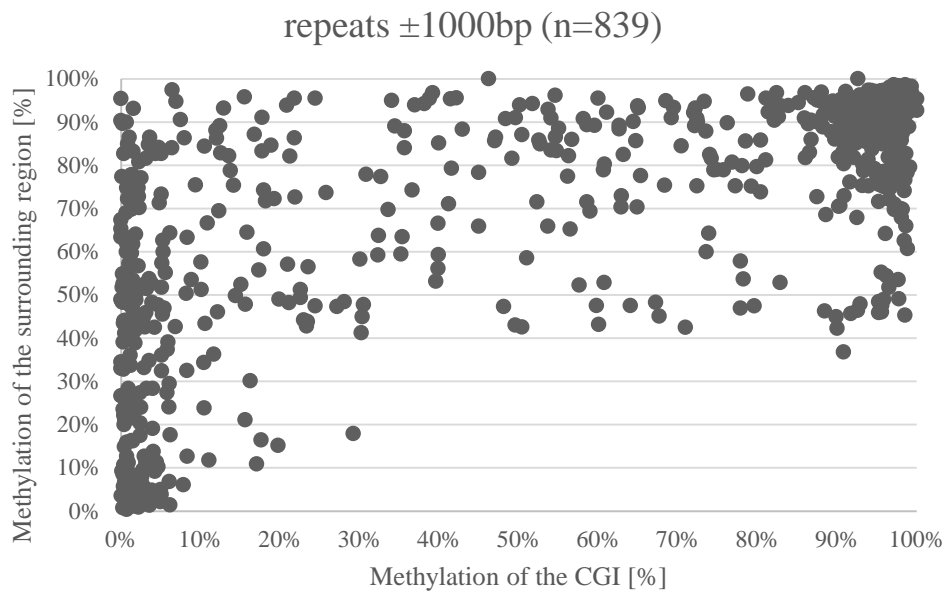

**Fig. S1:** Methylation level of the CGI overlapping a retrocopy plotted against the methylation level of the surrounding region containing at least one repeat 1000 bp upstream and downstream of the retrocopy.

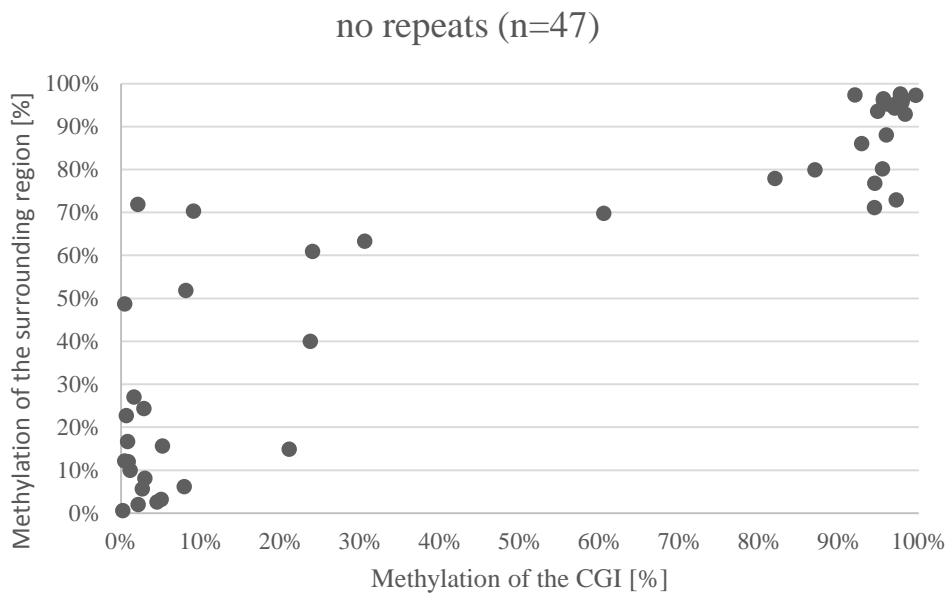

**Fig. S2:** Methylation level of the CGI overlapping a retrocopy plotted against the methylation level of the surrounding region containing no repeat 1000 bp upstream and downstream of the retrocopy.

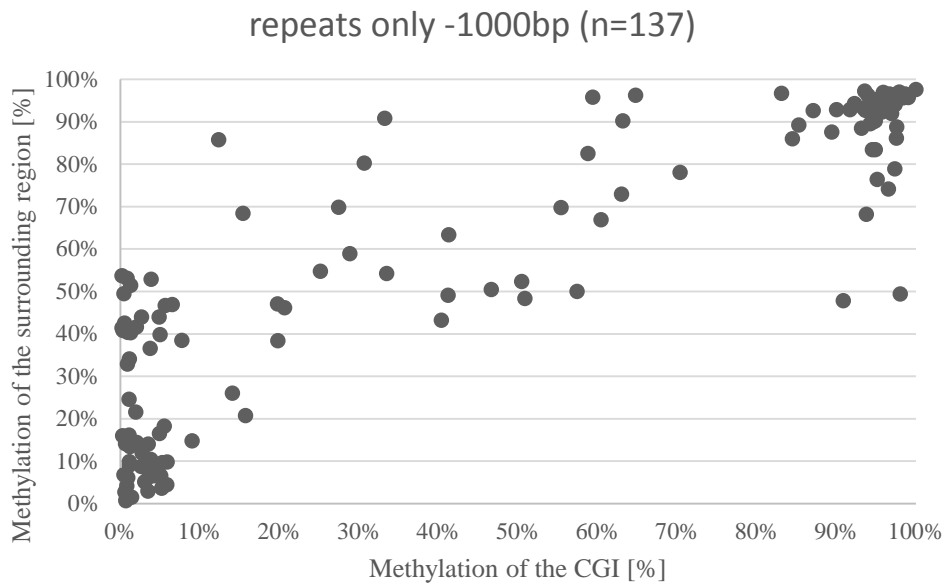

**Fig. S3:** Methylation level of the CGI overlapping a retrocopy plotted against the methylation level of the surrounding region containing at least one repeat 1000 bp downstream of the retrocopy.

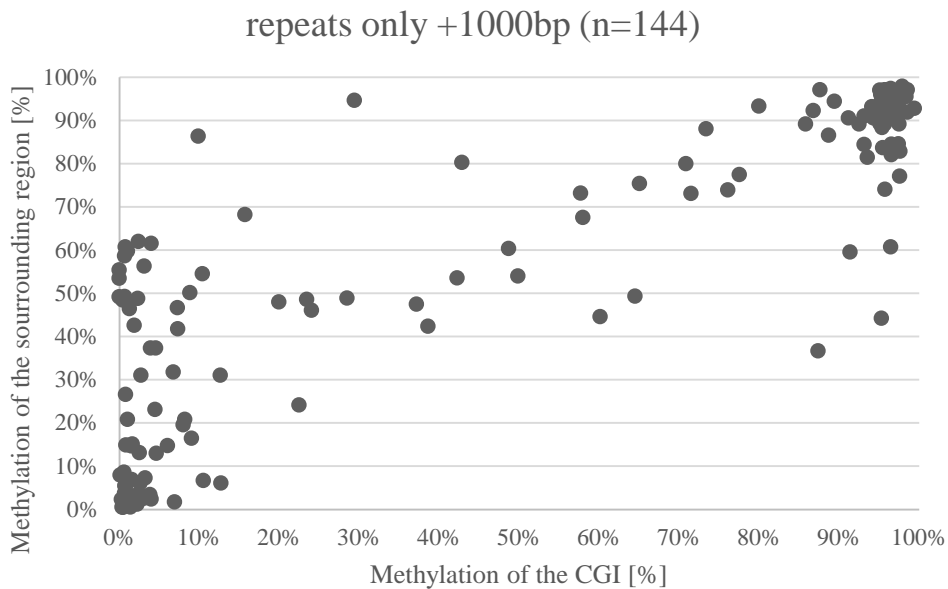

**Fig. S4:** Methylation level of the CGI overlapping a retrocopy plotted against the methylation level of the surrounding region containing at least one repeat 1000 bp upstream of the retrocopy.

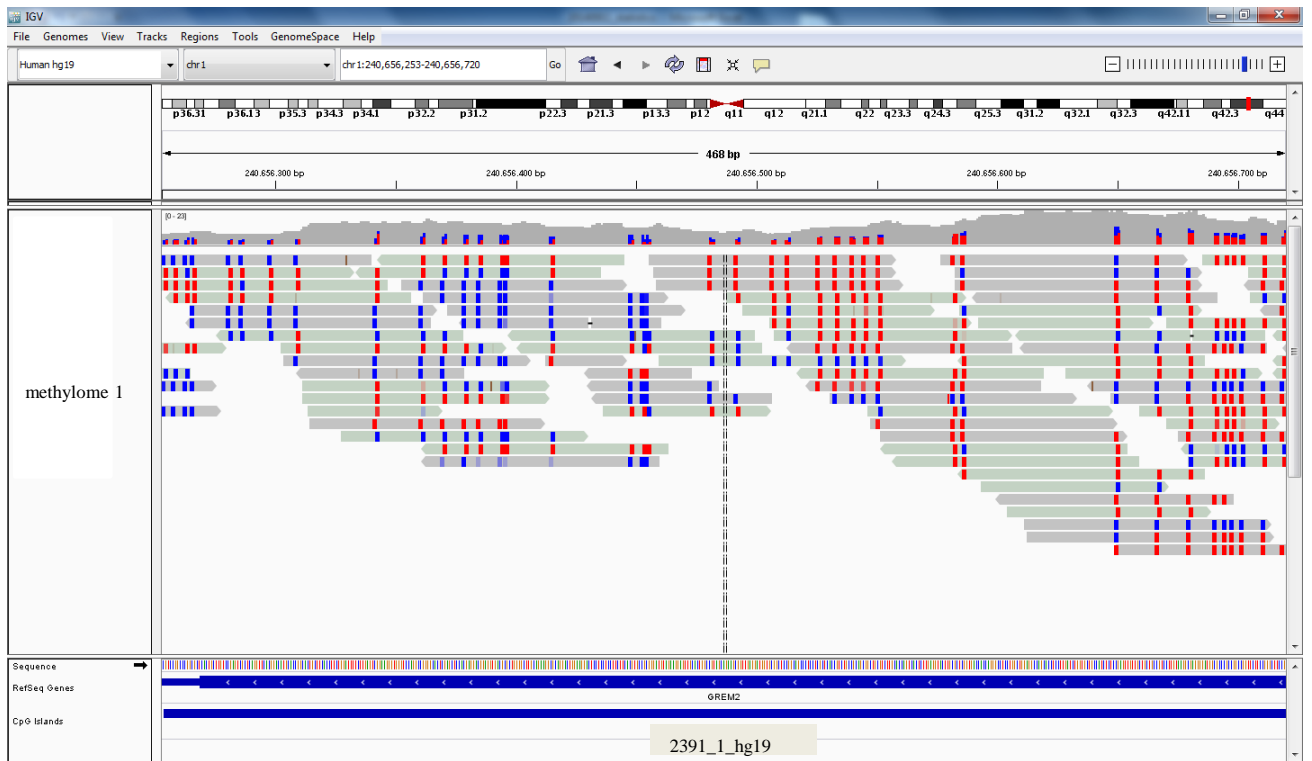

**Fig. S5:** Screenshot IGV Browser of CGI 2391\_1\_hg19 (*GREM2*)

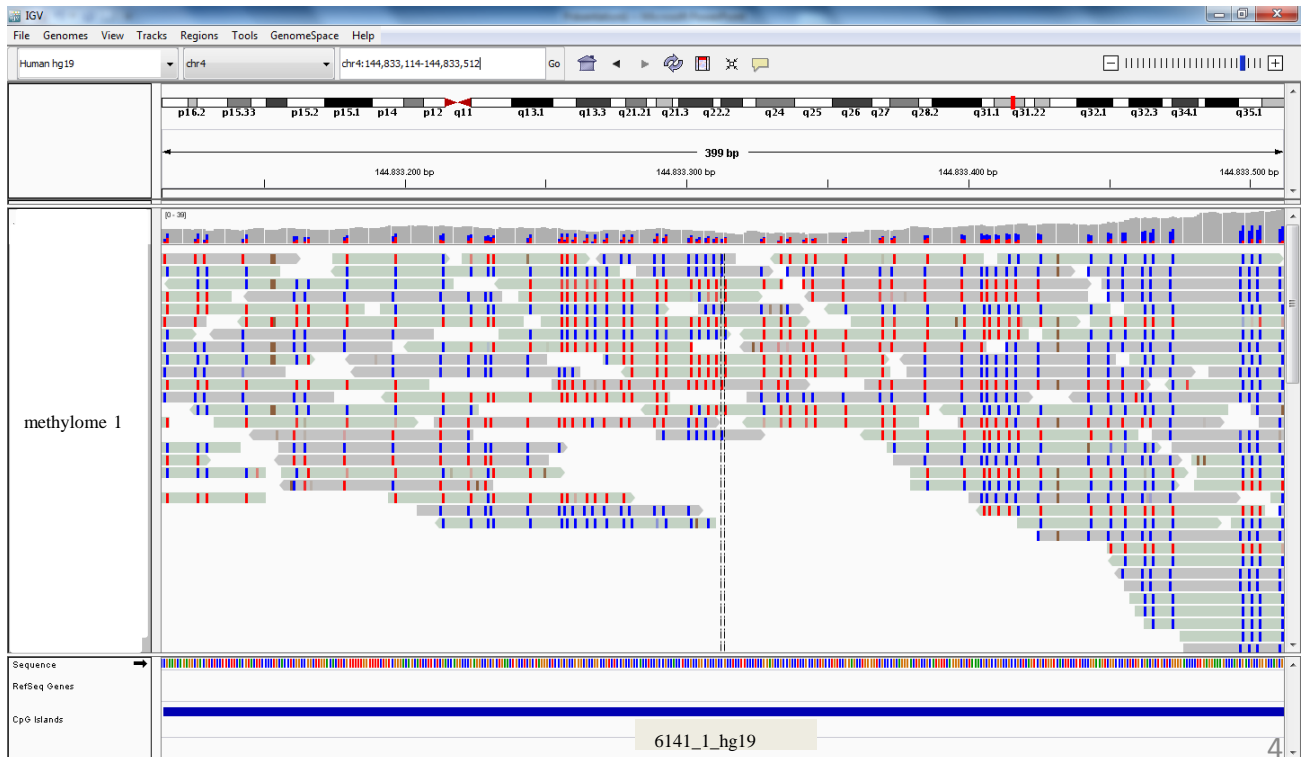

**Fig. S6:** Screenshot IGV Browser of CGI 6141\_1\_hg19 (*LOC101927636*)

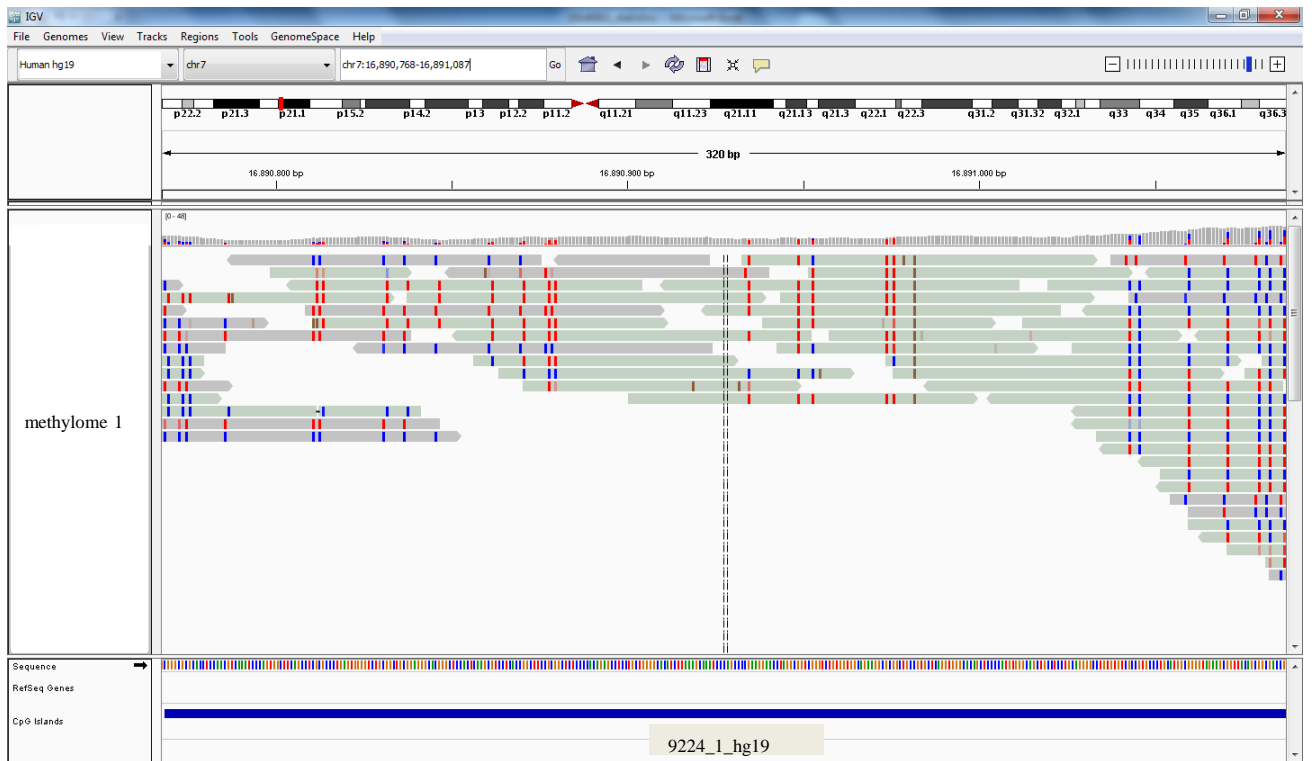

**Fig. S7:** Screenshot IGV Browser of CGI 9224\_1\_hg19 (intergenic)

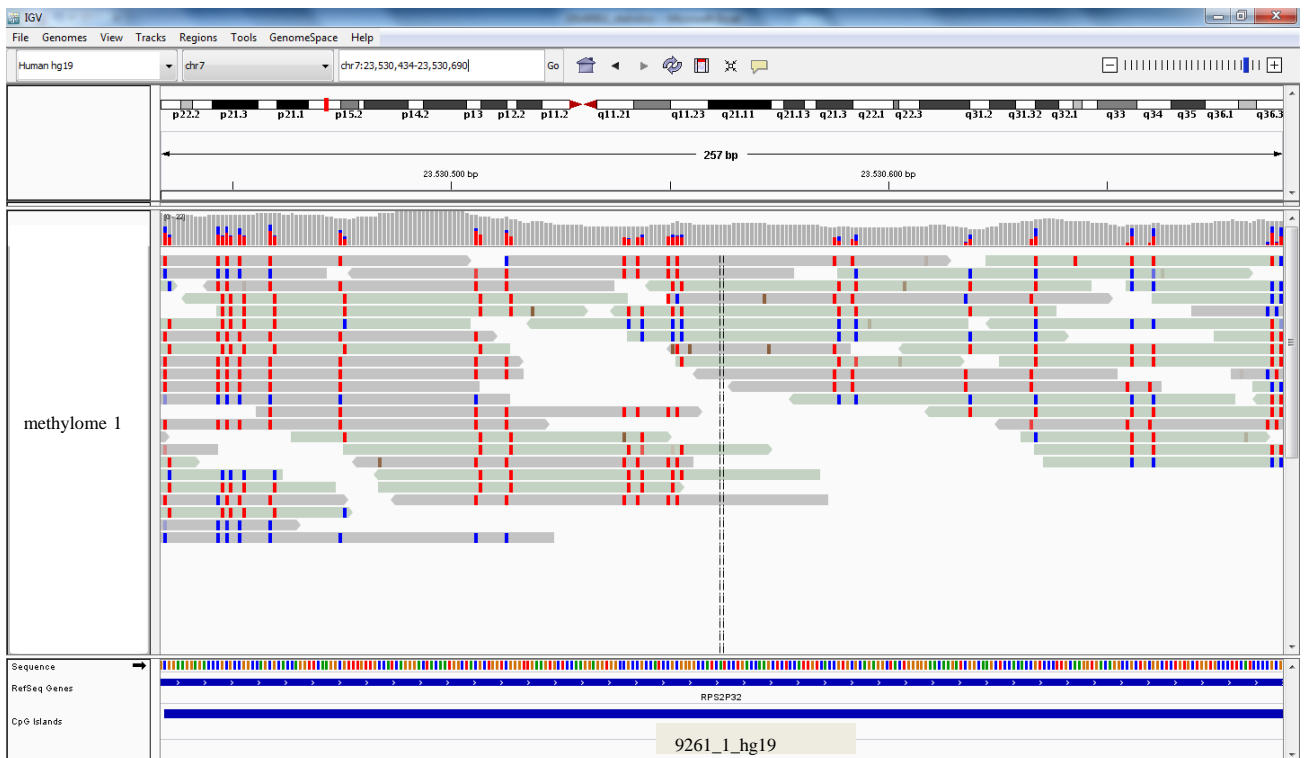

**Fig. S8:** Screenshot IGV Browser of CGI 9261\_1\_hg19 (*RPS2P32*)

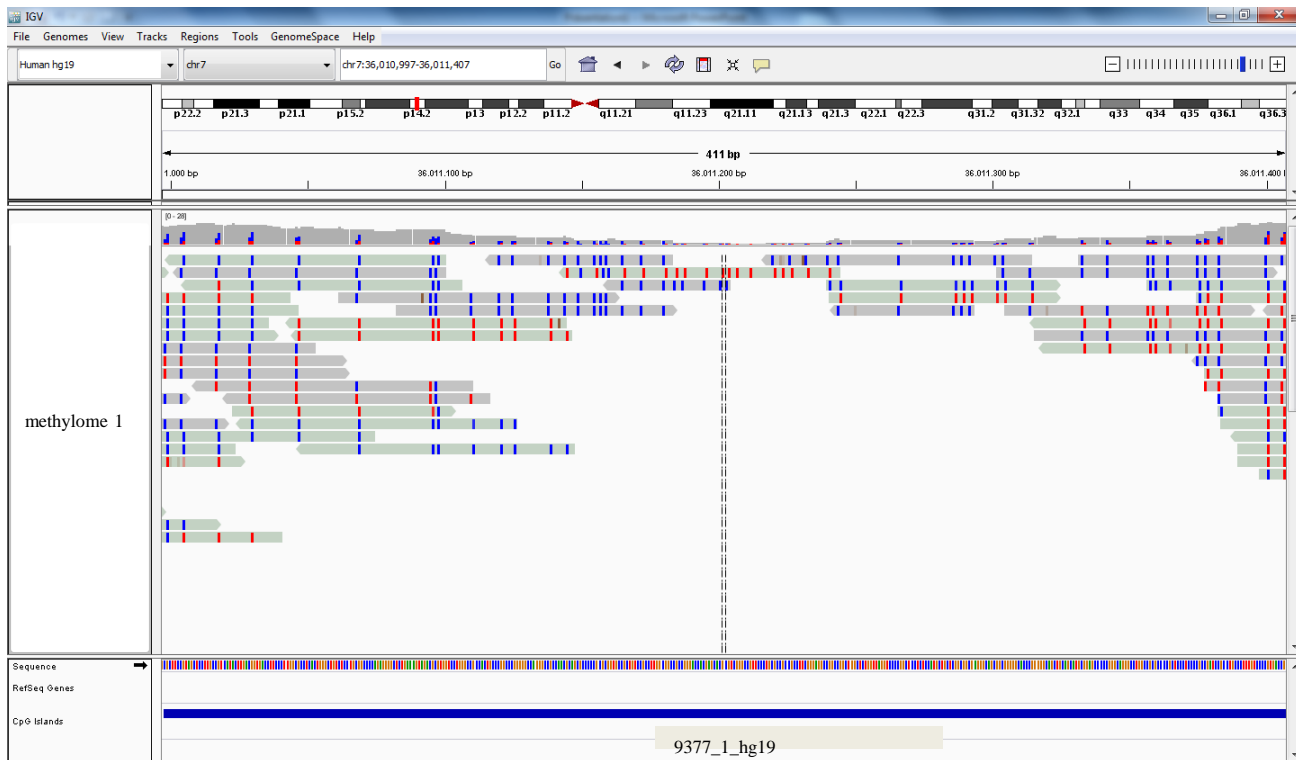

**Fig. S9:** Screenshot IGV Browser of CGI 9377\_1\_hg19 (intergenic)

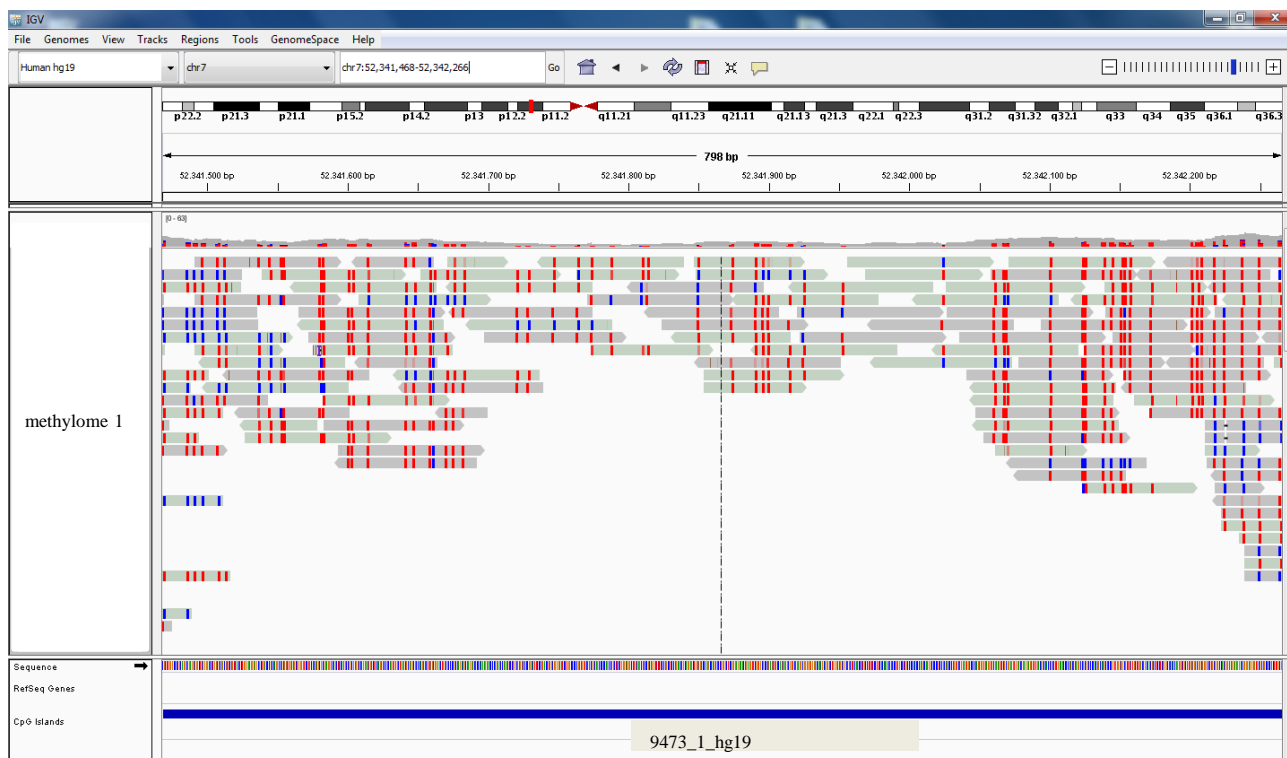

**Fig. S10:** Screenshot IGV Browser of CGI 9473\_1\_hg19 (intergenic)

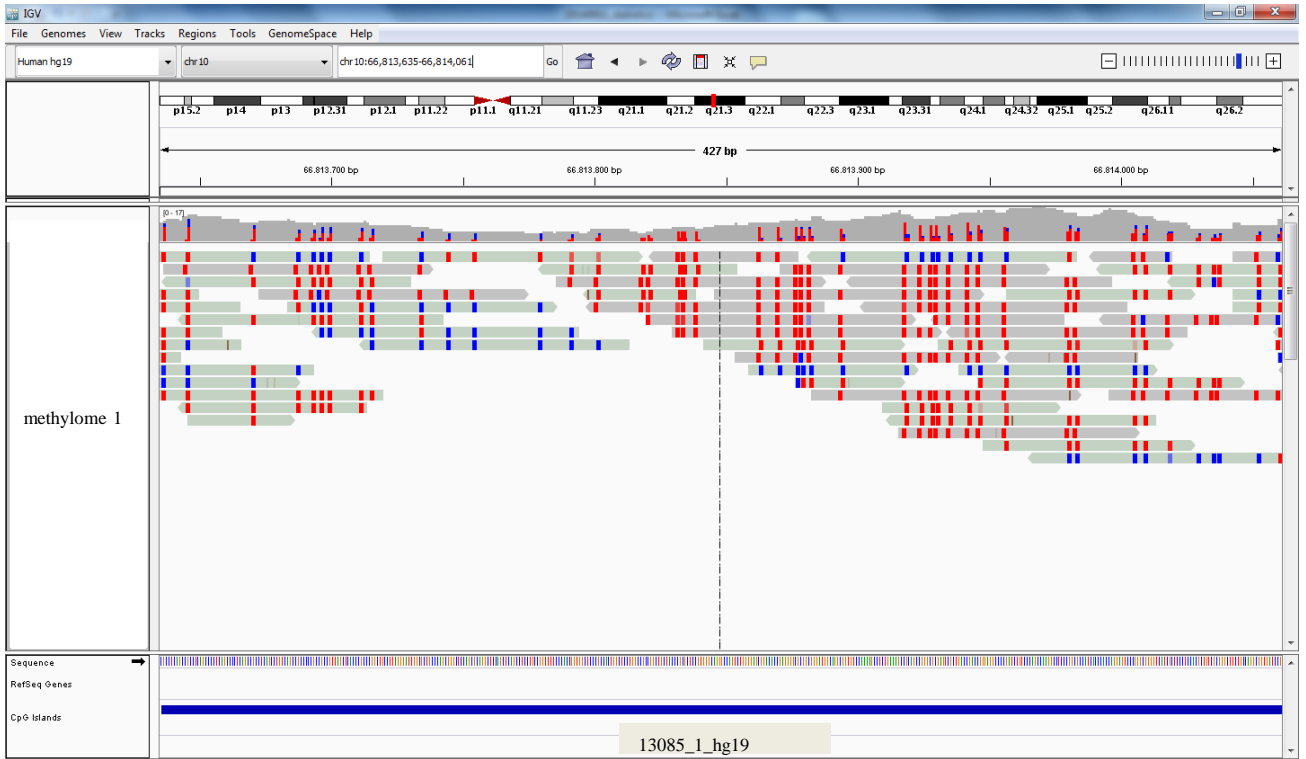

**Fig. S11:** Screenshot IGV Browser of CGI 13085\_1\_hg19 (intergenic)

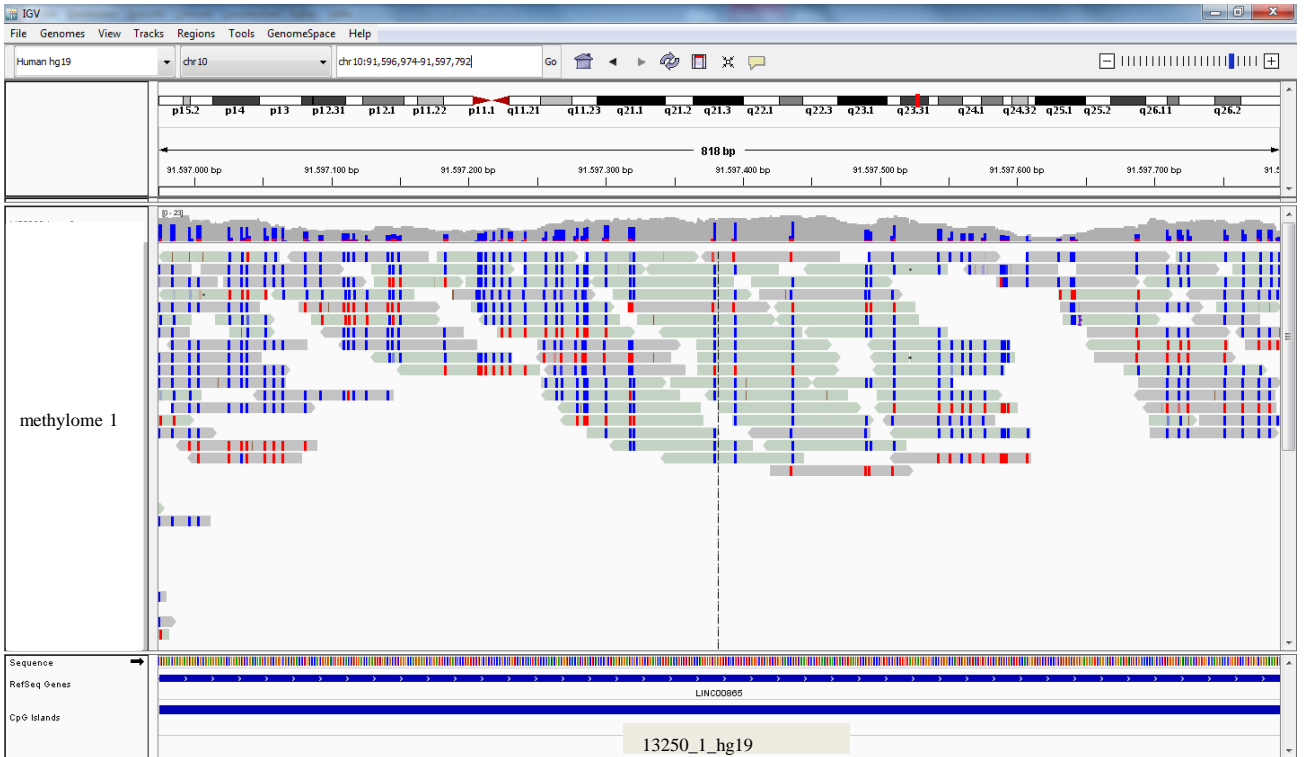

**Fig. S12:** Screenshot IGV Browser of CGI 13250\_1\_hg19 (*LINC00865*)

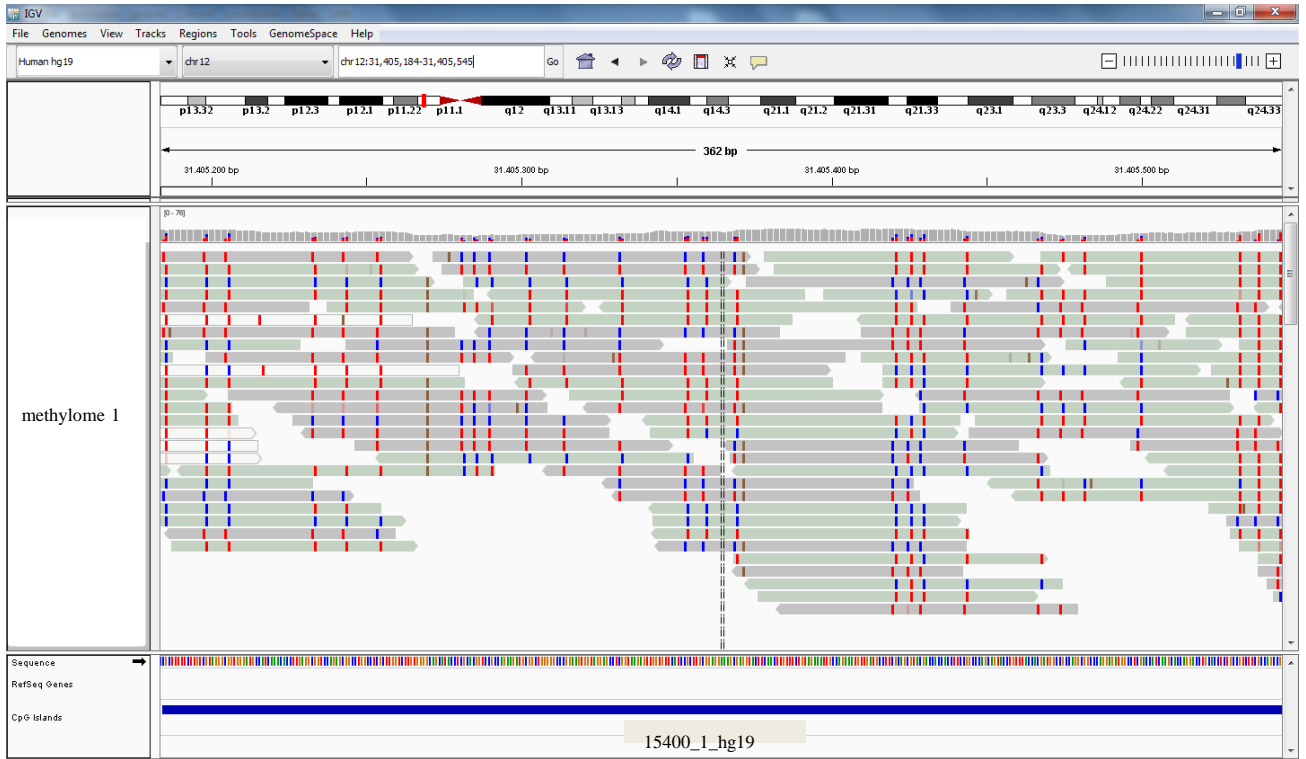

**Fig. S13:** Screenshot IGV Browser of CGI 15400\_1\_hg19 (intergenic)

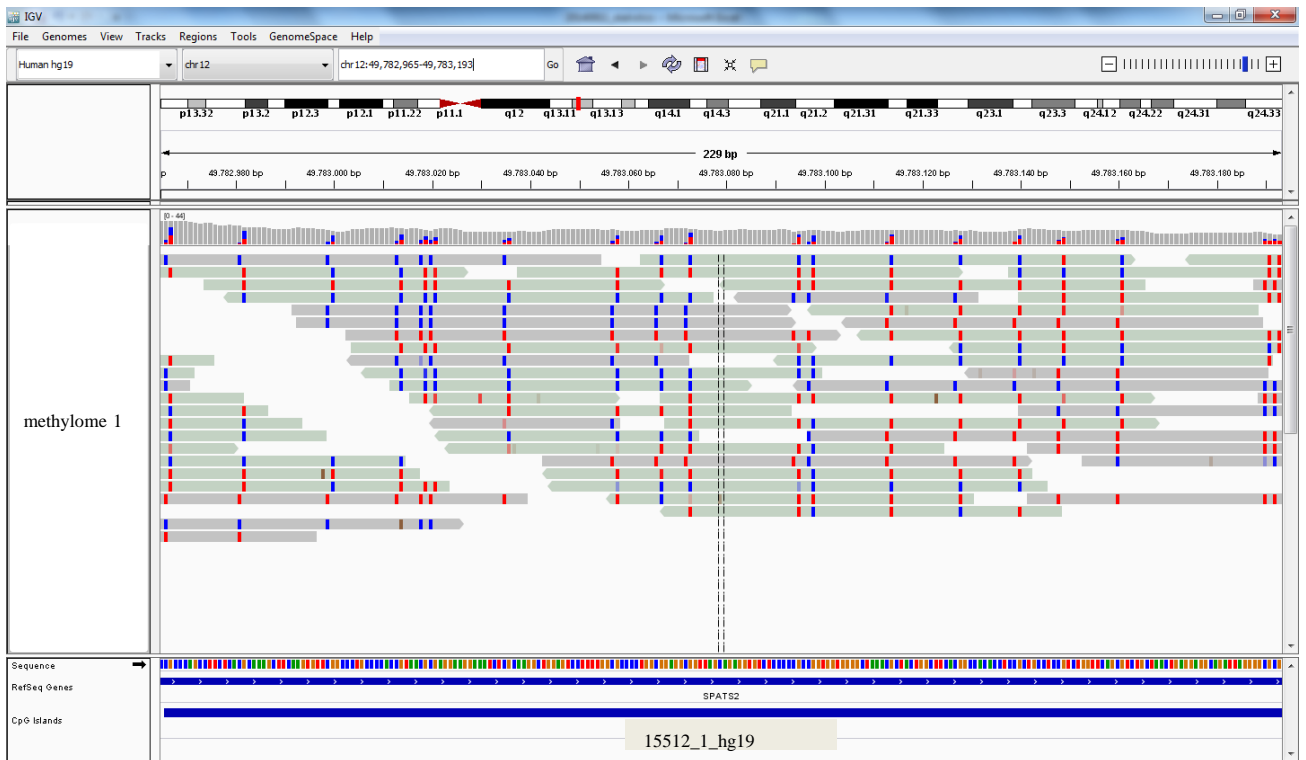

**Fig. S14:** Screenshot IGV Browser of CGI 15512\_1\_hg19 (*SPATS2*)





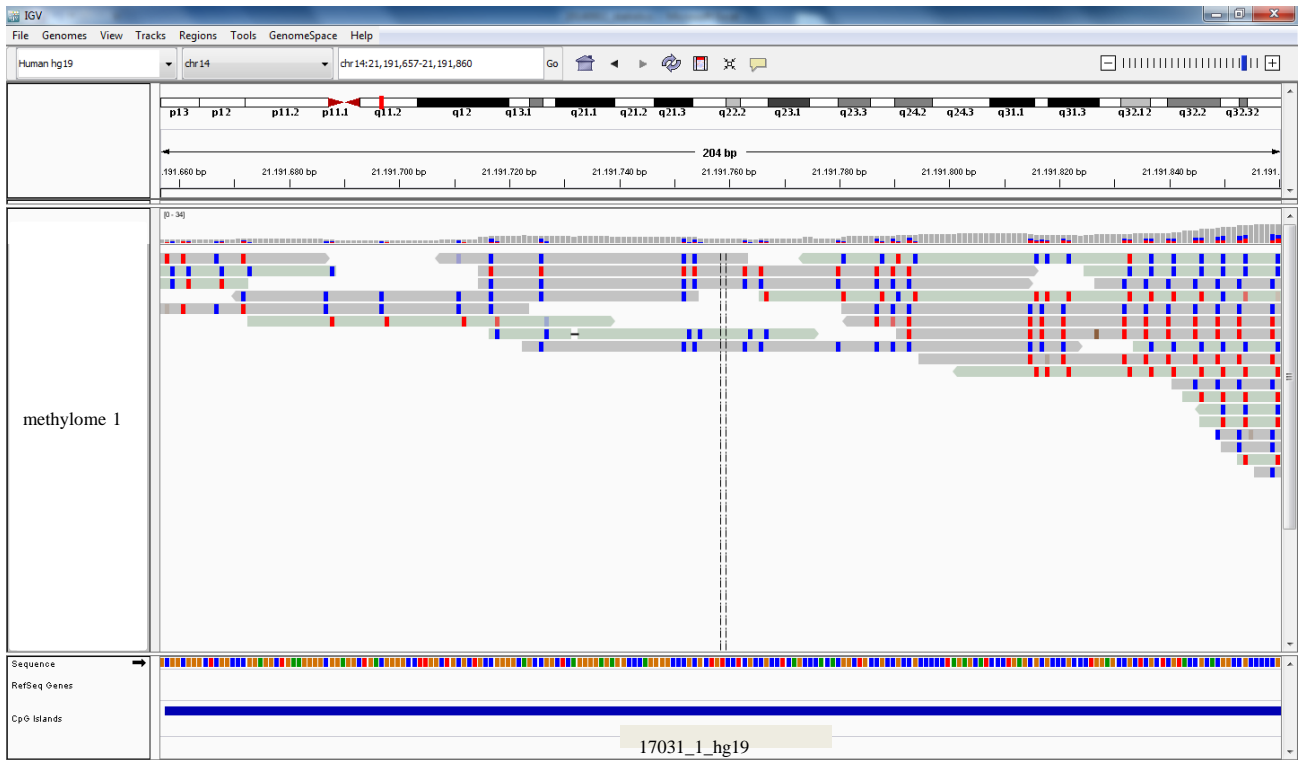

**Fig. S17:** Screenshot IGV Browser of CGI 17031\_1\_hg19 (intergenic)

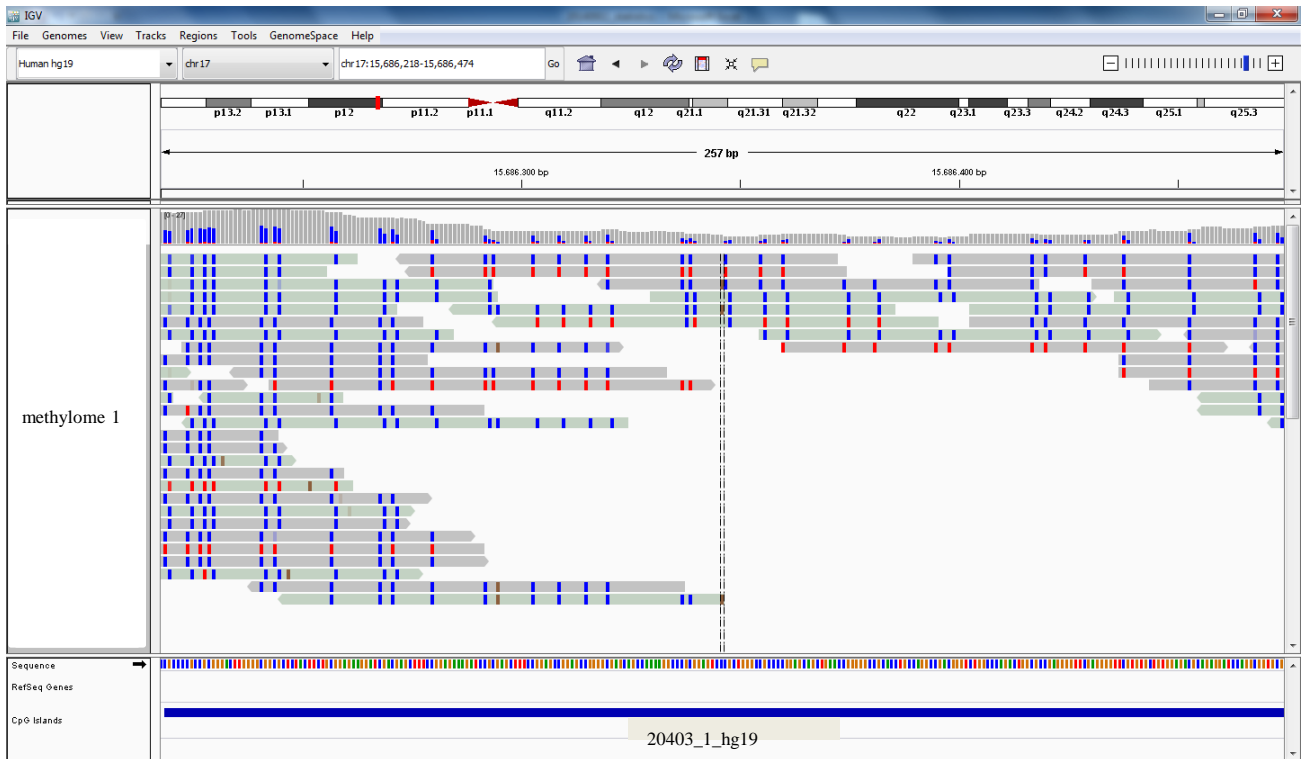

**Fig. S18:** Screenshot IGV Browser of CGI 20403\_1\_hg19 (intergenic)

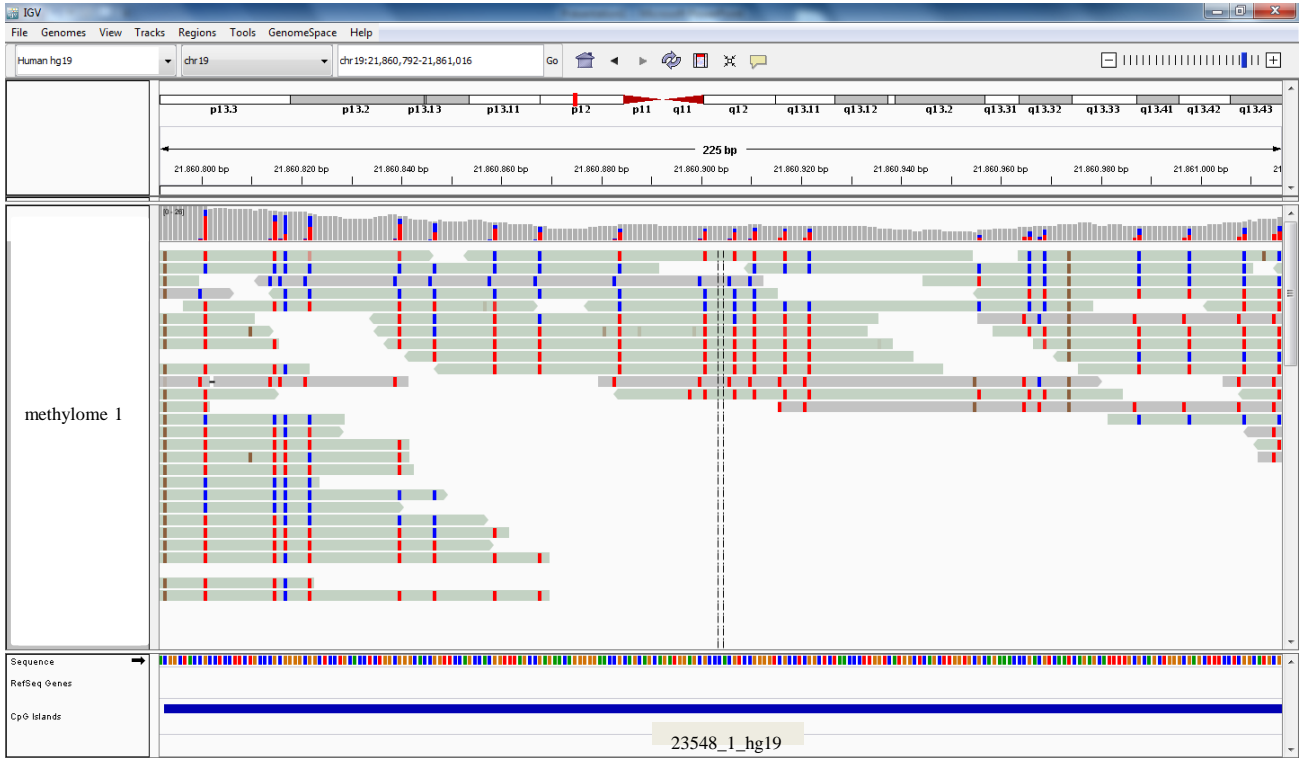

**Fig. S19:** Screenshot IGV Browser of CGI 23548\_1\_hg19 (intergenic)

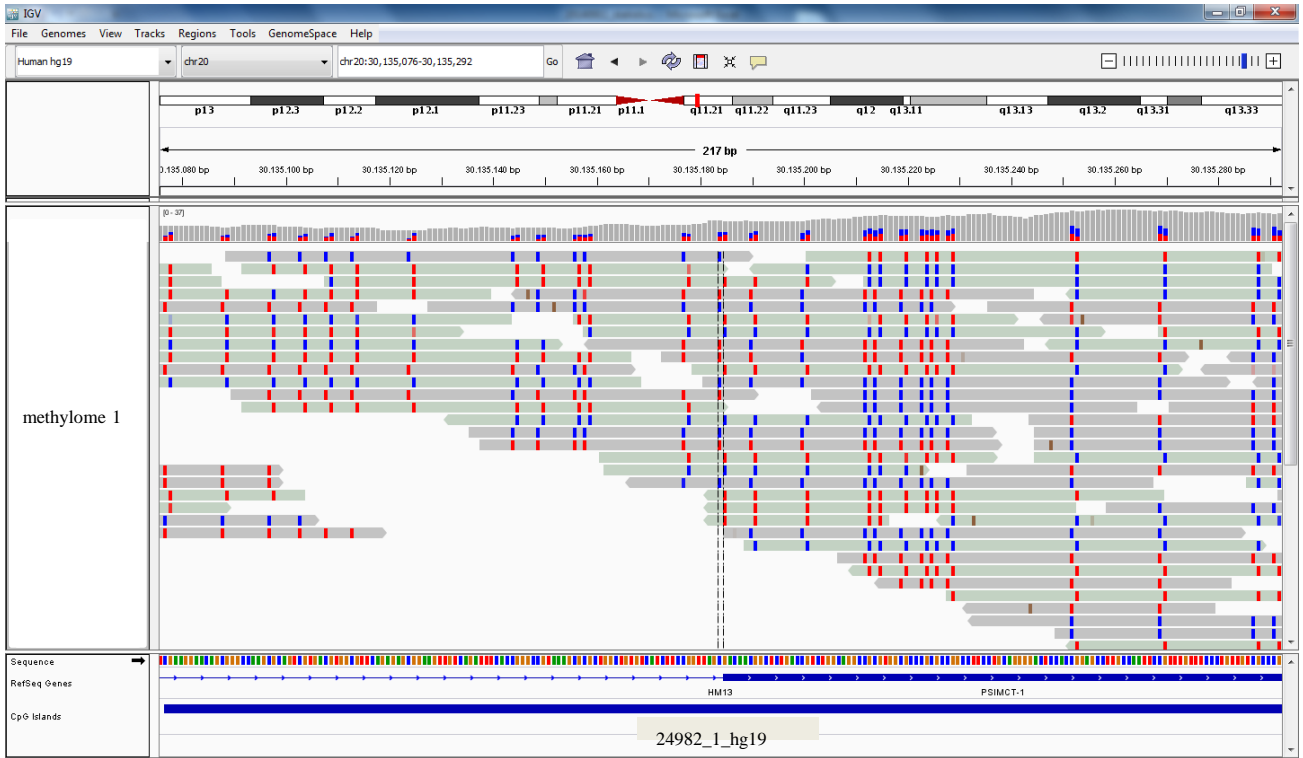

**Fig. S20:** Screenshot IGV Browser of CGI 24982\_1\_hg19 (*HM13*)

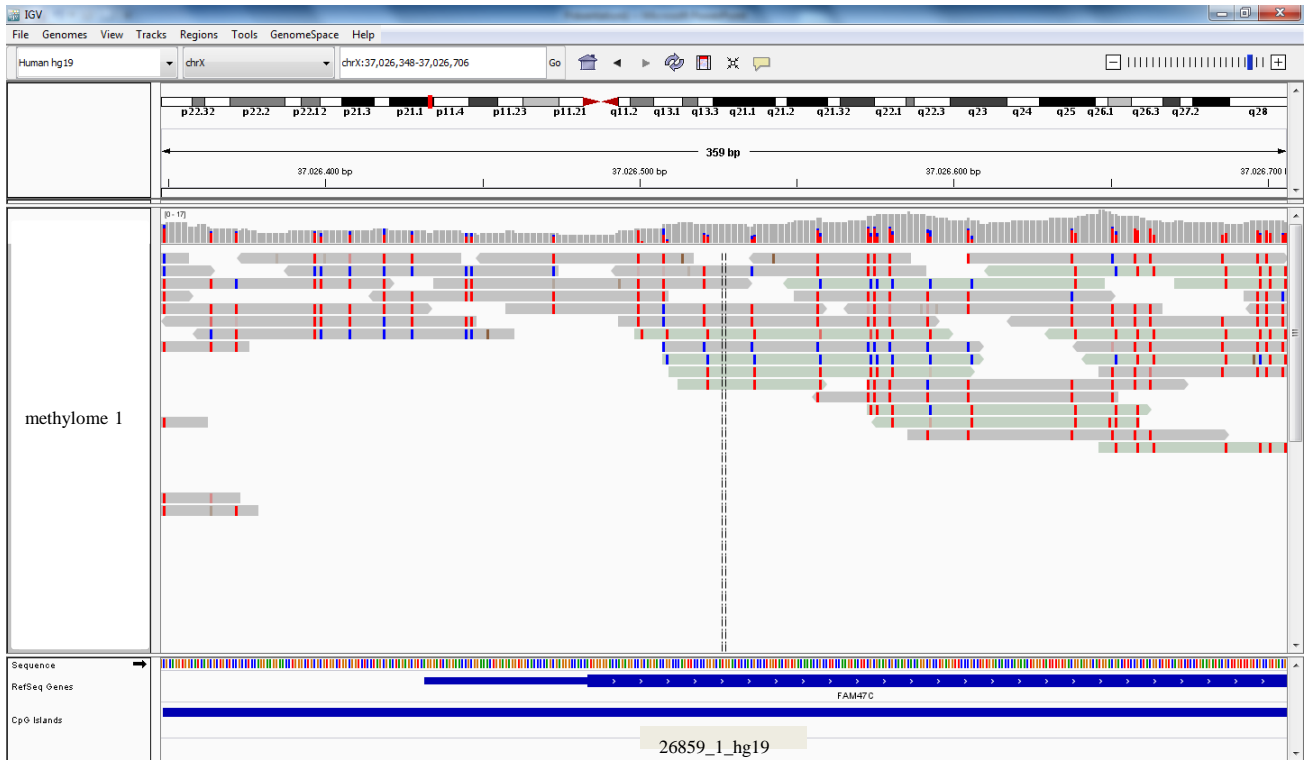

**Fig. S21:** Screenshot IGV Browser of CGI 26859\_1\_hg19 (*FAM47C*)

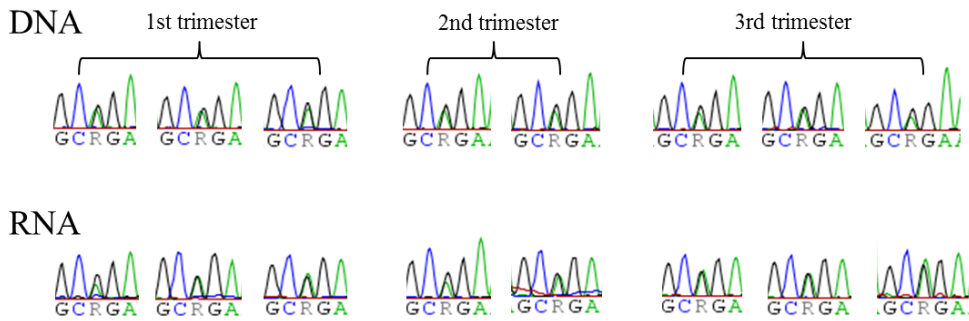

**Fig. S22:** Expression analysis of *IGF2BP3* in placenta of different trimester. Both alleles are present in RNA, which indicates biallelic expression.

**Table S1:** Classification of CGIs overlapping retrogenes

| number of occurrences of one CGI/retrogene | number of ancestral genes | number of CGIs |
|--------------------------------------------|---------------------------|----------------|
| 1                                          | 541                       | 541            |
| 2                                          | 134                       | 268            |
| 3                                          | 41                        | 123            |
| 4                                          | 26                        | 104            |
| 5                                          | 8                         | 40             |
| 6                                          | 7                         | 42             |
| 7                                          | 7                         | 49             |
| 8                                          | 2                         | 16             |
| 9                                          | 4                         | 36             |
| 10                                         | 1                         | 10             |
| 11                                         | 2                         | 22             |
| 12                                         | 0                         | 0              |
| 13                                         | 3                         | 39             |
| 14                                         | 0                         | 0              |
| 15                                         | 0                         | 0              |
| 16                                         | 1                         | 16             |
| not classifiable                           | n/a                       | 13             |
| <b>sum</b>                                 | <b>778</b>                | <b>1319</b>    |

**Table S2:** Expression level of retrogenes overlapping a CGI as classified by the UCSC browser

| number of retrogenes | expression level of retrogenes overlapping a CGI |     |                 |     |            |     |              |     |
|----------------------|--------------------------------------------------|-----|-----------------|-----|------------|-----|--------------|-----|
|                      | expressed                                        |     | expressed noOrf |     | pseudogene |     | total number |     |
|                      | 934                                              |     | 188             |     | 197        |     | 1319         |     |
| methylation CGIs     | [number]                                         | [%] | [number]        | [%] | [number]   | [%] | [number]     | [%] |
| CGIs m < 20%         | 273                                              | 29% | 84              | 45% | 27         | 14% | 384          | 29% |
| CGIs 20% ≥ m ≤ 80%   | 125                                              | 13% | 30              | 16% | 40         | 20% | 195          | 15% |
| CGIs m > 80%         | 436                                              | 47% | 45              | 24% | 107        | 54% | 588          | 45% |
| not covered*         | 100                                              | 11% | 29              | 15% | 23         | 12% | 152          | 12% |

**Table S3:** Genomic location of retrogenes overlapping a CGI according to RefSeq genes

| number of retrogenes | location of the retrogenes overlapping a CGI |     |                     |     |          |     |
|----------------------|----------------------------------------------|-----|---------------------|-----|----------|-----|
|                      | intergenic (RefSeq)                          |     | intragenic (RefSeq) |     | total    |     |
|                      | 660                                          |     | 659                 |     | 1319     |     |
| methylation CGIs     | [number]                                     | [%] | [number]            | [%] | [number] | [%] |
| CGIs m < 20%         | 119                                          | 18% | 265                 | 40% | 384      | 29% |
| CGIs 20% ≥ m ≤ 80%   | 124                                          | 19% | 68                  | 10% | 192      | 15% |
| CGIs m > 80%         | 313                                          | 47% | 278                 | 42% | 591      | 45% |
| not covered*         | 104                                          | 16% | 48                  | 7%  | 152      | 12% |

**Table S4:** Genomic location of retrogenes overlapping a CGI according to RefSeq genes according to their expression level

|                             | location of retrogenes overlapping a CGI |            |                     |            |            |            |
|-----------------------------|------------------------------------------|------------|---------------------|------------|------------|------------|
|                             | intergenic (RefSeq)                      |            | intragenic (RefSeq) |            | total      |            |
| <b>number of retrogenes</b> | 660                                      |            | 659                 |            | 1319       |            |
| <b>expression type</b>      | [number]                                 | [%]        | [number]            | [%]        | [number]   | [%]        |
| all 4 types expressed       | <b>395</b>                               | <b>60%</b> | <b>539</b>          | <b>82%</b> | <b>934</b> | <b>71%</b> |
| expressed                   | 8                                        | 1%         | 10                  | 2%         | 18         | 1%         |
| expressed weak              | 327                                      | 50%        | 109                 | 17%        | 436        | 33%        |
| expressed strong            | 42                                       | <b>6%</b>  | 119                 | 18%        | 161        | 12%        |
| expressed shuffle           | 18                                       | 3%         | 301                 | 46%        | 319        | 24%        |
| expressed noOrf             | <b>90</b>                                | <b>14%</b> | <b>98</b>           | <b>15%</b> | <b>188</b> | <b>14%</b> |
| pseudogene                  | <b>175</b>                               | <b>27%</b> | <b>22</b>           | <b>3%</b>  | <b>197</b> | <b>15%</b> |

**Table S5:** Expression level of intergenic retrogenes overlapping a CGI according to their methylation level

|                             | expression level of intergenic retrogenes overlapping a CGI |     |                   |     |                  |     |                        |     |
|-----------------------------|-------------------------------------------------------------|-----|-------------------|-----|------------------|-----|------------------------|-----|
|                             | expressed                                                   |     | expressed shuffle |     | expressed strong |     | expressed strong noOrf |     |
| <b>number of retrogenes</b> | 8                                                           |     | 18                |     | 42               |     | 14                     |     |
| <b>methylation CGIs</b>     | [number]                                                    | [%] | [number]          | [%] | [number]         | [%] | [number]               | [%] |
| CGIs m < 20%                | 2                                                           | 25% | 3                 | 17% | 9                | 21% | 7                      | 50% |
| CGIs 20% ≥ m ≤ 80%          | 0                                                           | 0%  | 2                 | 11% | 9                | 21% | 1                      | 7%  |
| CGIs m > 80%                | 4                                                           | 50% | 8                 | 44% | 21               | 50% | 1                      | 7%  |
| not covered*                | 2                                                           | 25% | 5                 | 28% | 3                | 7%  | 5                      | 36% |

|                             | expression level of intergenic retrogenes overlapping a CGI |     |                      |     |            |     |              |     |
|-----------------------------|-------------------------------------------------------------|-----|----------------------|-----|------------|-----|--------------|-----|
|                             | expressed weak                                              |     | expressed weak noOrf |     | pseudogene |     | total number |     |
| <b>number of retrogenes</b> | 327                                                         |     | 76                   |     | 175        |     | 660          |     |
| <b>methylation CGIs</b>     | [number]                                                    | [%] | [number]             | [%] | [number]   | [%] | [number]     | [%] |
| CGIs m < 20%                | 49                                                          | 15% | 26                   | 34% | 22         | 13% | 118          | 18% |
| CGIs 20% ≥ m ≤ 80%          | 65                                                          | 20% | 11                   | 14% | 38         | 22% | 126          | 19% |
| CGIs m > 80%                | 162                                                         | 50% | 23                   | 30% | 93         | 53% | 312          | 47% |
| not covered*                | 51                                                          | 16% | 16                   | 21% | 22         | 13% | 104          | 16% |

**Table S6:** Expression level of intragenic retrogenes overlapping a CGI according to their methylation level

|                             | expression level of intragenic retrogenes overlapping a CGI |     |                   |     |                  |     |                        |     |
|-----------------------------|-------------------------------------------------------------|-----|-------------------|-----|------------------|-----|------------------------|-----|
|                             | expressed                                                   |     | expressed shuffle |     | expressed strong |     | expressed strong noOrf |     |
| <b>number of retrogenes</b> | 10                                                          |     | 301               |     | 119              |     | 48                     |     |
| <b>methylation CGIs</b>     | [number]                                                    | [%] | [number]          | [%] | [number]         | [%] | [number]               | [%] |
| CGIs m < 20%                | 2                                                           | 20% | 136               | 45% | 57               | 48% | 21                     | 44% |
| CGIs 20% ≥ m ≤ 80%          | 1                                                           | 10% | 23                | 8%  | 12               | 10% | 15                     | 31% |
| CGIs m > 80%                | 2                                                           | 20% | 122               | 41% | 45               | 38% | 11                     | 23% |
| not covered*                | 5                                                           | 50% | 20                | 7%  | 5                | 4%  | 1                      | 2%  |

|                             | expression level of intragenic retrogenes overlapping a CGI |     |                      |     |            |     |              |     |
|-----------------------------|-------------------------------------------------------------|-----|----------------------|-----|------------|-----|--------------|-----|
|                             | expressed weak                                              |     | expressed weak noOrf |     | pseudogene |     | total number |     |
| <b>number of retrogenes</b> | 109                                                         |     | 50                   |     | 22         |     | 659          |     |
| <b>methylation CGIs</b>     | [number]                                                    | [%] | [number]             | [%] | [number]   | [%] | [number]     | [%] |
| CGIs m < 20%                | 14                                                          | 13% | 30                   | 60% | 5          | 23% | 265          | 40% |
| CGIs 20% ≥ m ≤ 80%          | 12                                                          | 11% | 3                    | 6%  | 2          | 9%  | 68           | 10% |
| CGIs m > 80%                | 74                                                          | 68% | 10                   | 20% | 14         | 64% | 278          | 42% |
| not covered*                | 9                                                           | 8%  | 7                    | 14% | 1          | 5%  | 48           | 7%  |

**Table S7:** CGI methylation levels in other tissues. For each CGI methylation (meth.) and coverage (cov.) are specified. **red:** methylation > 80%, **blue:** methylation < 20%, \* data published in Rademacher et al. (2014), \*\* data published by Ziller et al. (2013), \*\*\* data published by Okae et al. (2014)

| sample_name                       | cell/tissue              | 2391_1_hg19 |      | 6141_1_hg19 |      | 9224_1_hg19 |      | 9261_1_hg19 |      | 9377_1_hg19 |      | 9473_1_hg19 |      |
|-----------------------------------|--------------------------|-------------|------|-------------|------|-------------|------|-------------|------|-------------|------|-------------|------|
|                                   |                          | meth.       | cov. |
| Monocyte methylome 1 *            | monocyte                 | 56%         | 12   | 49%         | 18   | 58%         | 13   | 72%         | 15   | 39%         | 7    | 79%         | 12   |
| Monocyte methylome 2 *            | monocyte                 | 63%         | 8    | 54%         | 7    | 31%         | 12   | 49%         | 6    | 65%         | 5    | 80%         | 5    |
| Frontal_cortex_normal_1 **        | cortex                   | 57%         | 42   | 32%         | 46   | 57%         | 51   | 41%         | 42   | 63%         | 49   | 92%         | 45   |
| Frontal_cortex_normal_2 **        | cortex                   | 47%         | 32   | 25%         | 35   | 61%         | 32   | 45%         | 28   | 66%         | 25   | 83%         | 32   |
| Frontal_cortex_AD_1 **            | cortex                   | 29%         | 41   | 29%         | 43   | 69%         | 43   | 31%         | 38   | 67%         | 37   | 82%         | 41   |
| Frontal_cortex_AD_2 **            | cortex                   | 56%         | 57   | 35%         | 54   | 62%         | 67   | 46%         | 46   | 67%         | 47   | 87%         | 55   |
| IMR90 **                          | Lung, foetel, fibroblast | 75%         | 18   | 24%         | 12   | 24%         | 12   | 56%         | 24   | 44%         | 15   | 70%         | 14   |
| Colon_Primary_Normal **           | colon                    | 70%         | 54   | 45%         | 33   | 45%         | 33   | 55%         | 66   | 37%         | 39   | 79%         | 44   |
| human sperm **                    | sperm                    | 2%          | 6    | 5%          | 9    | 0%          | 5    | 6%          | 6    | 1%          | 8    | 2%          | 6    |
| adult liver replicate 1 **        | liver                    | 87%         | 63   | 49%         | 65   | 66%         | 46   | 62%         | 57   | 29%         | 50   | 80%         | 73   |
| adult liver replicate 2 **        | liver                    | 71%         | 49   | 28%         | 43   | 79%         | 56   | 48%         | 69   | 30%         | 44   | 68%         | 50   |
| hippocampus middle replicate 1 ** | hippocampus middle       | 60%         | 52   | 35%         | 40   | 62%         | 41   | 46%         | 67   | 60%         | 37   | 90%         | 60   |
| hippocampus middle replicate 2 ** | hippocampus middle       | 52%         | 39   | 33%         | 35   | 61%         | 47   | 42%         | 45   | 57%         | 38   | 89%         | 46   |
| fetal heart (119) **              | fetal heart              | 50%         | 40   | 19%         | 34   | 66%         | 40   | 53%         | 69   | 31%         | 32   | 66%         | 40   |
| fetal thymus (1238) **            | fetal thymus             | 45%         | 41   | 15%         | 36   | 50%         | 29   | 44%         | 57   | 29%         | 40   | 73%         | 35   |
| fetal adrenal (1244) **           | fetal adrenal            | 26%         | 25   | 21%         | 24   | 76%         | 22   | 28%         | 29   | 17%         | 34   | 65%         | 32   |
| fetal muscle leg (1243) **        | fetal muscle leg         | 49%         | 35   | 11%         | 34   | 61%         | 25   | 37%         | 40   | 26%         | 35   | 77%         | 35   |
| fetal brain (515) **              | fetal brain              | 58%         | 24   | 19%         | 24   | 66%         | 20   | 39%         | 28   | 33%         | 18   | 89%         | 27   |
| human oocytes 1 ***               | oocytes                  | 1%          | 6    | 5%          | 7    | 91%         | 9    | 94%         | 9    | 2%          | 8    | 7%          | 7    |
| human oocytes 2 ***               | oocytes                  | 3%          | 3    | 11%         | 3    | 100%        | 2    | 100%        | 2    | 2%          | 2    | 23%         | 2    |

| sample_name                       | cell/tissue              | 13085_1_hg19 |      | 13250_1_hg19 |      | 15400_1_hg19 |      | 15512_1_hg19 |      | 16448_1_hg19 |      | 16458_1_hg19 |      |
|-----------------------------------|--------------------------|--------------|------|--------------|------|--------------|------|--------------|------|--------------|------|--------------|------|
|                                   |                          | meth.        | cov. |
| Monocyte methylome 1 *            | monocyte                 | 76%          | 8    | 22%          | 10   | 69%          | 16   | 54%          | 18   | 79%          | 13   | 31%          | 11   |
| Monocyte methylome 2 *            | monocyte                 | 78%          | 3    | 1%           | 4    | 77%          | 11   | 35%          | 7    | 90%          | 10   | 12%          | 5    |
| Frontal_cortex_normal_1 **        | cortex                   | 83%          | 47   | 2%           | 60   | 88%          | 42   | 86%          | 28   | 49%          | 45   | 18%          | 40   |
| Frontal_cortex_normal_2 **        | cortex                   | 90%          | 36   | 4%           | 43   | 91%          | 29   | 89%          | 16   | 52%          | 44   | 11%          | 33   |
| Frontal_cortex_AD_1 **            | cortex                   | 91%          | 35   | 6%           | 47   | 85%          | 37   | 70%          | 20   | 68%          | 38   | 40%          | 31   |
| Frontal_cortex_AD_2 **            | cortex                   | 91%          | 42   | 12%          | 68   | 80%          | 45   | 83%          | 27   | 56%          | 53   | 40%          | 38   |
| IMR90 **                          | Lung, foetel, fibroblast | 91%          | 21   | 8%           | 16   | 70%          | 22   | 80%          | 21   | 54%          | 16   | 15%          | 14   |
| Colon_Primary_Normal **           | colon                    | 84%          | 38   | 7%           | 44   | 86%          | 52   | 74%          | 51   | 88%          | 61   | 43%          | 38   |
| human sperm **                    | sperm                    | 2%           | 9    | 0%           | 9    | 3%           | 6    | 8%           | 5    | 8%           | 11   | 2%           | 8    |
| adult liver replicate 1 **        | liver                    | 82%          | 68   | 10%          | 57   | 69%          | 69   | 88%          | 68   | 72%          | 76   | 31%          | 43   |
| adult liver replicate 2 **        | liver                    | 72%          | 53   | 5%           | 46   | 70%          | 49   | 73%          | 56   | 47%          | 64   | 37%          | 47   |
| hippocampus middle replicate 1 ** | hippocampus middle       | 75%          | 52   | 10%          | 48   | 89%          | 66   | 89%          | 60   | 56%          | 59   | 14%          | 39   |
| hippocampus middle replicate 2 ** | hippocampus middle       | 72%          | 35   | 2%           | 45   | 92%          | 44   | 83%          | 36   | 50%          | 44   | 36%          | 34   |
| fetal heart (119) **              | fetal heart              | 51%          | 35   | 5%           | 37   | 79%          | 48   | 38%          | 36   | 31%          | 44   | 15%          | 31   |
| fetal thymus (1238) **            | fetal thymus             | 77%          | 37   | 2%           | 37   | 68%          | 35   | 73%          | 33   | 90%          | 34   | 25%          | 24   |
| fetal adrenal (1244) **           | fetal adrenal            | 60%          | 29   | 2%           | 30   | 69%          | 27   | 69%          | 24   | 28%          | 22   | 20%          | 21   |
| fetal muscle leg (1243) **        | fetal muscle leg         | 64%          | 41   | 1%           | 38   | 86%          | 37   | 59%          | 26   | 37%          | 31   | 22%          | 24   |
| fetal brain (515) **              | fetal brain              | 70%          | 21   | 0%           | 25   | 90%          | 27   | 55%          | 21   | 40%          | 27   | 20%          | 24   |
| human oocytes 1 ***               | oocytes                  | 0%           | 2    | 0%           | 4    | 0%           | 10   | 94%          | 6    | 2%           | 5    | 0%           | 8    |
| human oocytes 2 ***               | oocytes                  | 12%          | 3    | 1%           | 3    | 0%           | 2    | 100%         | 1    | 2%           | 2    | 9%           | 3    |

| sample_name                       | cell/tissue              | 17031_1_hg19 |      | 20403_1_hg19 |      | 23548_1_hg19 |      | 24982_1_hg19 |      | 26859_1_hg19 |      |
|-----------------------------------|--------------------------|--------------|------|--------------|------|--------------|------|--------------|------|--------------|------|
|                                   |                          | meth.        | cov. |
| Monocyte methylome 1 *            | monocyte                 | 42%          | 7    | 20%          | 13   | 59%          | 14   | 55%          | 20   | 77%          | 8    |
| Monocyte methylome 2 *            | monocyte                 | 46%          | 18   | 13%          | 11   | 42%          | 10   | 55%          | 12   | 94%          | 4    |
| Frontal_cortex_normal_1 **        | cortex                   | 65%          | 40   | 3%           | 32   | 81%          | 51   | 27%          | 44   | 73%          | 61   |
| Frontal_cortex_normal_2 **        | cortex                   | 57%          | 31   | 1%           | 24   | 78%          | 36   | 34%          | 35   | 73%          | 50   |
| Frontal_cortex_AD_1 **            | cortex                   | 35%          | 30   | 4%           | 30   | 68%          | 38   | 29%          | 38   | 71%          | 41   |
| Frontal_cortex_AD_2 **            | cortex                   | 52%          | 51   | 3%           | 41   | 58%          | 47   | 35%          | 59   | 73%          | 72   |
| IMR90 **                          | Lung, foetel, fibroblast | 33%          | 14   | 12%          | 9    | 48%          | 16   | 57%          | 26   | 61%          | 18   |
| Colon_Primary_Normal **           | colon                    | 72%          | 46   | 22%          | 30   | 77%          | 65   | 55%          | 63   | 86%          | 26   |
| human sperm **                    | sperm                    | 8%           | 10   | 3%           | 8    | 3%           | 9    | 5%           | 6    | 5%           | 3    |
| adult liver replicate 1 **        | liver                    | 64%          | 56   | 24%          | 30   | 44%          | 79   | 58%          | 94   | 83%          | 41   |
| adult liver replicate 2 **        | liver                    | 55%          | 56   | 16%          | 32   | 41%          | 51   | 59%          | 62   | 79%          | 33   |
| hippocampus middle replicate 1 ** | hippocampus middle       | 58%          | 41   | 5%           | 38   | 59%          | 79   | 43%          | 83   | 88%          | 41   |
| hippocampus middle replicate 2 ** | hippocampus middle       | 54%          | 38   | 7%           | 30   | 63%          | 58   | 39%          | 64   | 88%          | 27   |
| fetal heart (119) **              | fetal heart              | 41%          | 38   | 5%           | 30   | 29%          | 38   | 51%          | 53   | 78%          | 24   |
| fetal thymus (1238) **            | fetal thymus             | 36%          | 31   | 9%           | 29   | 40%          | 31   | 44%          | 47   | 67%          | 38   |
| fetal adrenal (1244) **           | fetal adrenal            | 27%          | 25   | 5%           | 22   | 23%          | 33   | 46%          | 36   | 85%          | 12   |
| fetal muscle leg (1243) **        | fetal muscle leg         | 16%          | 36   | 6%           | 25   | 56%          | 38   | 45%          | 44   | 68%          | 38   |
| fetal brain (515) **              | fetal brain              | 45%          | 26   | 4%           | 16   | 31%          | 30   | 55%          | 34   | 71%          | 25   |
| human oocytes 1 ***               | oocytes                  | 0%           | 4    | 7%           | 6    | 17%          | 6    | 83%          | 3    | 4%           | 9    |
| human oocytes 2 ***               | oocytes                  | 13%          | 1    | 0%           | 3    | 2%           | 2    | 89%          | 5    | 3%           | 4    |

**Table S8:** Primer sequences for genomic sequence analysis

| CGI_ID                           | Primer name    | Primer sequence (5'-3') | Tm (°C) | Cycles | Product size (bp) | BetaIn | SNP                      |
|----------------------------------|----------------|-------------------------|---------|--------|-------------------|--------|--------------------------|
| <b>Genomic sequence analysis</b> |                |                         |         |        |                   |        |                          |
| 2391_1_hg19                      | 2391_1_hg19_F  | GTCTTGCACCAGTCACTCTTG   | 64      | 35     | 272               | no     | rs11806449               |
|                                  | 2391_1_hg19_R  | TACTCTACGGCCCTTCACAG    |         |        |                   |        |                          |
| 6141_1_hg19                      | 6141_1_hg19_F  | CTGGAATTTTGGACCATGC     | 64      | 45     | 428               | yes    | rs1849135                |
|                                  | 6141_1_hg19_R  | CGCTGGGCTTTCCTCAAG      |         |        |                   |        |                          |
| 9224_1_hg19                      | 9224_1_hg19_F  | TTAAAGCAAATCCCAGCCCC    | 68      | 35     | 186               | no     | rs6959065                |
|                                  | 9224_1_hg19_R  | AAAAAACAAAGGCGGTGCGC    |         |        |                   |        |                          |
| 9261_1_hg19                      | 9261_1_hg19_F  | GACCAAGTCTCCATTGTCA     | 63      | 35     | 289               | no     | rs10228640               |
|                                  | 9261_1_hg19_R  | GGGATCAGGTAGCTGTAGATG   |         |        |                   |        |                          |
| 9377_1_hg19                      | 9377_1_hg19_F  | GGCTGGCTCTGGTTAGGTC     | 64      | 35     | 318               | no     | rs1962367<br>rs140384299 |
|                                  | 9377_1_hg19_R  | AGCTCAAAGATGCCAGTGAAG   |         |        |                   |        |                          |
| 9473_1_hg19                      | 9473_1_hg19_F  | ACCGCTTTGAAACCCCTACT    | 62      | 35     | 244               | no     | rs62463194               |
|                                  | 9473_1_hg19_R  | GGACTTGGGCCTTTGTGTT     |         |        |                   |        |                          |
| 13085_1_hg19                     | 13085_1_hg19_F | CCACCAAAGGGAAGCTTGTA    | 64      | 35     | 319               | no     | rs10996168               |
|                                  | 13085_1_hg19_R | GCTCTGGCCATGATCTCT      |         |        |                   |        |                          |
| 13250_1_hg19                     | 13250_1_hg19_F | CTCTGAACGCCTGTTCCTTC    | 64      | 35     | 250               | no     | rs61869800               |
|                                  | 13250_1_hg19_R | AGCAGCCTCTCCACTTGGT     |         |        |                   |        |                          |
| 15400_1_hg19                     | 15400_1_hg19_F | ATTGGGCTCAGATCAGGAG     | 66      | 35     | 650               | no     | rs670519                 |
|                                  | 15400_1_hg19_R | GAAGAAAAGCCTTTCCCAAG    |         |        |                   |        |                          |
| 15512_1_hg19                     | 15512_1_hg19_F | CCTTCTCACGCAAAAGCTTCA   | 68      | 35     | 218               | no     | rs77023346               |
|                                  | 15512_1_hg19_R | GCCCTAATCTGCCTCTC       |         |        |                   |        |                          |
| 16448_1_hg19                     | 16448_1_hg19_F | TCCAACACATACTATACCACAG  | 66      | 45     | 234               | yes    | rs4770130                |
|                                  | 16448_1_hg19_R | GATGTTCTCGAGCTCCATGG    |         |        |                   |        |                          |
| 16458_1_hg19                     | 16458_1_hg19_F | CGGTCTGCCAACTCTTG       | 64      | 35     | 225               | no     | rs7333053                |
|                                  | 16458_1_hg19_R | CTGCCTGCCTGATATGACTG    |         |        |                   |        |                          |
| 17031_1_hg19                     | 17031_1_hg19_F | GCCCTCCACAAGGAAACT      | 64      | 45     | 512               | yes    | rs7141760                |
|                                  | 17031_1_hg19_R | AAAGGCAGATGGCTCATACC    |         |        |                   |        |                          |
| 20403_1_hg19                     | 20403_1_hg19_F | GGCGYGGCTCTACTTCTG      | 64      | 35     | 256               | no     | rs11078314               |
|                                  | 20403_1_hg19_R | CCATTGGCTTTCACATGACAG   |         |        |                   |        |                          |
| 23548_1_hg19                     | 23548_1_hg19_F | CCATCTGGCTCAAGCTGTC     | 68      | 35     | 334               | no     | rs12975447               |
|                                  | 23548_1_hg19_R | AAGATGATGGGGAACTGC      |         |        |                   |        |                          |
| 24982_1_hg19                     | 24982_1_hg19_F | TCATCTCCGGTTAGCGACA     | 64      | 35     | 226               | no     | rs45612231               |
|                                  | 24982_1_hg19_R | CCAGTTGGCTCTTAATGCC     |         |        |                   |        |                          |
| 26859_1_hg19                     | 26859_1_hg19_F | CTAGAGCGTCAGGGATCAGG    | 64      | 35     | 279               | no     | no SNP                   |
|                                  | 26859_1_hg19_R | GGCGACAAACAAGCGTATCT    |         |        |                   |        |                          |

**Table S9:** Primer sequences for deep bisulfite sequencing (universal tags in bold)

| CGI_ID                                                    | Primer name       | Primer sequence (5'-3')                                 | Tm (°C) | Product size (bp) |
|-----------------------------------------------------------|-------------------|---------------------------------------------------------|---------|-------------------|
| <b>Deep bisulfite sequencing (universal tags in bold)</b> |                   |                                                         |         |                   |
| 2391_1_hg19                                               | 2391_1_hg19_Ftag  | <b>CTTGCTTCCTGGCAGCAGTGGAGGTTAGTATTTTTTTGATTG</b>       | 56      | 309               |
|                                                           | 2391_1_hg19_RM13  | <b>CAGGAAACAGCTATGACCTAAACAACAAAACCAACCATATCTA</b>      |         |                   |
| 6141_1_hg19                                               | 6141_1_hg19_Ftag  | <b>CTTGCTTCCTGGCAGCAGTGAATTGTTTGTAGGGTT</b>             | 53      | 360               |
|                                                           | 6141_1_hg19_RM13  | <b>CAGGAAACAGCTATGACATCTCTTTCCATTCATAATTTA</b>          |         |                   |
| 9224_1_hg19                                               | 9224_1_hg19_Ftag  | <b>CTTGCTTCCTGGCAGCAGTGTGGGGTATATTTAAAGTAAATTTAG</b>    | 54      | 258               |
|                                                           | 9224_1_hg19_RM13  | <b>CAGGAAACAGCTATGACAAAATTAACAAATYACAAAAA</b>           |         |                   |
| 9261_1_hg19                                               | 9261_1_hg19_Ftag  | <b>CTTGCTTCCTGGCAGCAGATTTGATTAAGTTTTTTATTGTTA</b>       | 50      | 350               |
|                                                           | 9261_1_hg19_RM13  | <b>CAGGAAACAGCTATGACTCTCCTTCCAAAAATCCTTC</b>            |         |                   |
| 9473_1_hg19                                               | 9473_1_hg19_Ftag  | <b>CTTGCTTCCTGGCAGCAGTGGATTGAGGAGTGTGATAGTTAT</b>       | 56      | 307               |
|                                                           | 9473_1_hg19_RM13  | <b>CAGGAAACAGCTATGACCCCAATAAACTTAAACCTTTATATTTTTATT</b> |         |                   |
| 13250_1_hg19                                              | 13250_1_hg19_Ftag | <b>CTTGCTTCCTGGCAGCAGTTAGATTAGTTTTGTTTTATTGTAG</b>      | 56      | 233               |
|                                                           | 13250_1_hg19_RM13 | <b>CAGGAAACAGCTATGACACTCCAACAACCTCTCCACTTAAT</b>        |         |                   |
| 15400_1_hg19                                              | 15400_1_hg19_Ftag | <b>CTTGCTTCCTGGCAGCAGTTGTTTGGTATTTTATAGTAAAT</b>        | 50      | 577               |
|                                                           | 15400_1_hg19_RM13 | <b>CAGGAAACAGCTATGACATAAAATATCCAAAAATTTTCC</b>          |         |                   |
| 16448_1_hg19                                              | 16448_1_hg19_Ftag | <b>CTTGCTTCCTGGCAGCAGTGGTTTTGAGAATATTATGTT</b>          | 50      | 342               |
|                                                           | 16448_1_hg19_RM13 | <b>CAGGAAACAGCTATGACATATAAAAAACTAAAAATCTTACC</b>        |         |                   |
| 16458_1_hg19                                              | 16458_1_hg19_Ftag | <b>CTTGCTTCCTGGCAGCAGTATTGTTGTTGTTGATGATGTTG</b>        | 48      | 466               |
|                                                           | 16458_1_hg19_RM13 | <b>CAGGAAACAGCTATGACAAAAATAAATAACTCTTTTACCATAACC</b>    |         |                   |
| 17031_1_hg19                                              | 17031_1_hg19_Ftag | <b>CTTGCTTCCTGGCAGCAGGGTTTTAGGGGAGAGGTTTAGG</b>         | 56      | 294               |
|                                                           | 17031_1_hg19_RM13 | <b>CAGGAAACAGCTATGACCCCTTAAACTTATTAATCAAACTCCAAA</b>    |         |                   |
| 20403_1_hg19                                              | 20403_1_hg19_Ftag | <b>CTTGCTTCCTGGCAGCAGATTTAAGAAGTGTTTTTTTGTTT</b>        | 56      | 369               |
|                                                           | 20403_1_hg19_RM13 | <b>CAGGAAACAGCTATGACACTAAATCTTCACTCTTAAATATCCACT</b>    |         |                   |
| 23548_1_hg19                                              | 23548_1_hg19_Ftag | <b>CTTGCTTCCTGGCAGCAGGTTAGTAGGGTTTGGTTTTTAGGG</b>       | 56      | 312               |
|                                                           | 23548_1_hg19_RM13 | <b>CAGGAAACAGCTATGACCATAAAAAATAAAAAAACTACCCC</b>        |         |                   |

**Table S10:** Primer sequences for RNA analysis

| Gene                     | Primer name        | Primer sequence (5'-3') | Tm (°C) | Product size (bp) |
|--------------------------|--------------------|-------------------------|---------|-------------------|
| <b>mRNA analysis</b>     |                    |                         |         |                   |
| RPS2P32                  | 9261_1_hg19_F      | GACCAAGCTCTCCATTGTCA    | 63      | 289               |
|                          | 9261_1_hg19_R      | GGGATCAGGTAGCTGTAGATG   |         |                   |
| IGF2BP3                  | F_mRNA_IGF2BP3     | GCTGAGGAGGAGATCATGAAG   | 59      | 378               |
|                          | R_mRNA_IGF2BP3     | GAAGTGAAGCTCTGGTGGTC    | 60      |                   |
| <b>SNaPshot analysis</b> |                    |                         |         |                   |
| RPS2P32                  | RPS2P32_SNAPSHOT_F | CACTGCCACCCTGGGCA       | 66      |                   |
|                          | RPS2P32_SNAPSHOT_R | CTTCGCCAACGCCACCTT      | 65      |                   |



**Table S11:** Detailed description of the analyzed 17 RO-CGIs.

| CGI UCSC     |       |           |           |        |             |               |            | METHYLOME PRJEB5800 |               |
|--------------|-------|-----------|-----------|--------|-------------|---------------|------------|---------------------|---------------|
| CGI_ID       | CHR   | START     | STOP      | LENGTH | C+G-CONTENT | RATIO OBS/EXP | NUMBER CGs | MEAN METH           | MEAN COVERAGE |
| 2391_1_hg19  | chr1  | 240656253 | 240656720 | 467    | 65%         | 0,79          | 39         | 56%                 | 12            |
| 6141_1_hg19  | chr4  | 144833114 | 144833512 | 398    | 54%         | 1,34          | 54         | 49%                 | 18            |
| 9224_1_hg19  | chr7  | 16890768  | 16891087  | 319    | 68%         | 0,7           | 26         | 58%                 | 13            |
| 9261_1_hg19  | chr7  | 23530434  | 23530690  | 256    | 65%         | 0,75          | 20         | 72%                 | 15            |
| 9377_1_hg19  | chr7  | 36010997  | 36011407  | 410    | 76%         | 0,85          | 50         | 39%                 | 7             |
| 9473_1_hg19  | chr7  | 52341468  | 52342266  | 798    | 69%         | 0,62          | 59         | 79%                 | 12            |
| 13085_1_hg19 | chr10 | 66813635  | 66814061  | 426    | 74%         | 0,77          | 44         | 76%                 | 8             |
| 13250_1_hg19 | chr10 | 91596974  | 91597792  | 818    | 67%         | 0,69          | 63         | 22%                 | 10            |
| 15400_1_hg19 | chr12 | 31405184  | 31405545  | 361    | 60%         | 0,79          | 26         | 69%                 | 16            |
| 15512_1_hg19 | chr12 | 49782965  | 49783193  | 228    | 64%         | 0,81          | 19         | 54%                 | 18            |
| 16448_1_hg19 | chr13 | 21893156  | 21893605  | 449    | 67%         | 0,92          | 46         | 79%                 | 13            |
| 16458_1_hg19 | chr13 | 23412207  | 23412623  | 416    | 72%         | 0,83          | 43         | 31%                 | 11            |
| 17031_1_hg19 | chr14 | 21191657  | 21191860  | 203    | 80%         | 0,83          | 27         | 42%                 | 7             |
| 20403_1_hg19 | chr17 | 15686218  | 15686474  | 256    | 72%         | 0,98          | 32         | 20%                 | 13            |
| 23548_1_hg19 | chr19 | 21860792  | 21861016  | 224    | 67%         | 0,89          | 22         | 59%                 | 14            |
| 24982_1_hg19 | chr20 | 30135076  | 30135292  | 216    | 64%         | 1,12          | 25         | 55%                 | 20            |
| 26859_1_hg19 | chrX  | 37026348  | 37026706  | 358    | 64%         | 0,79          | 29         | 77%                 | 8             |

| CGI_ID       | RETROCOPY             |                        | ALL RETROCOPIES*            | REGION -1000BP OF THE RETROCOPY |                       |                                  |
|--------------|-----------------------|------------------------|-----------------------------|---------------------------------|-----------------------|----------------------------------|
|              | RETROCOPY             | EXPRESSION             | TOTAL NUMBER OF RETROCOPIES | -1000bp mean meth               | -1000bp mean coverage | -1000bp repeat                   |
| 2391_1_hg19  | <i>retro_GREM1</i>    | expressed strong       | 1                           | 68%                             | 15                    | low complexity                   |
| 6141_1_hg19  | <i>retro_SAV1</i>     | expressed weak         | 1                           | 49%                             | 51                    | no                               |
| 9224_1_hg19  | <i>retro_ARHGAP20</i> | expressed weak         | 2                           | 55%                             | 54                    | L1                               |
| 9261_1_hg19  | <i>retro_RPS2</i>     | expressed weak         | 63                          | 96%                             | 24                    | ALU                              |
| 9377_1_hg19  | <i>retro_PPP1R14B</i> | expressed weak         | 5                           | 95%                             | 75                    | simple repeat, L1, hAT-Charlie   |
| 9473_1_hg19  | <i>retro_CCDC115</i>  | pseudogene             | 1                           | 91%                             | 38                    | low complexity, ALU, ERV1        |
| 13085_1_hg19 | <i>retro_NEK4</i>     | pseudogene             | 7                           | 89%                             | 25                    | simple repeat, low complexity    |
| 13250_1_hg19 | <i>retro_MARK2</i>    | expressed strong noOrf | 32                          | 97%                             | 29                    | ERVL-MaLR, L2                    |
| 15400_1_hg19 | <i>retro_RPL13AP5</i> | expressed weak         | 18                          | 88%                             | 38                    | simple repeat, ALU, TcMar-Tigger |
| 15512_1_hg19 | <i>retro_FGFR1OP2</i> | expressed weak         | 4                           | 86%                             | 47                    | ALU, L1                          |
| 16448_1_hg19 | <i>retro_GRK6</i>     | expressed weak         | 2                           | 92%                             | 42                    | MIR, L1                          |
| 16458_1_hg19 | <i>retro_IPMK</i>     | expressed weak noOrf   | 2                           | 77%                             | 21                    | ALU, ERVL                        |
| 17031_1_hg19 | <i>retro_XPO6</i>     | expressed weak         | 1                           | 96%                             | 45                    | TcMar-Tigger                     |
| 20403_1_hg19 | <i>retro_IL6ST</i>    | expressed weak noOrf   | 1                           | 43%                             | 24                    | low complexity, ALU, L1, rRNA    |
| 23548_1_hg19 | <i>retro_MTDH</i>     | expressed weak         | 14                          | 54%                             | 65                    | low complexity                   |
| 24982_1_hg19 | <i>retro_MCTS1</i>    | expressed strong       | 1                           | 85%                             | 28                    | ALU, ERVL-MaLR                   |
| 26859_1_hg19 | <i>retro_FAM47E</i>   | expressed weak         | 4                           | 76%                             | 17                    | L1                               |

| CGI_ID       | REGION +1000BP OF THE RETROCOPY |                       |                                         | ANCESTRAL GENE  |                            |
|--------------|---------------------------------|-----------------------|-----------------------------------------|-----------------|----------------------------|
|              | +1000bp mean meth               | +1000bp mean coverage | +1000bp Repeat                          | ANCESTRAL GENE  | ANCESTRAL GENE NUMBER CGIs |
| 2391_1_hg19  | 87%                             | 28                    | ALU, MIR                                | <i>GREM1</i>    | 1                          |
| 6141_1_hg19  | 72%                             | 53                    | ERVL-MaLR, hAT-Charlie                  | <i>SAV1</i>     | 1                          |
| 9224_1_hg19  | 50%                             | 22                    | simple repeat                           | <i>ARHGAP20</i> | 1                          |
| 9261_1_hg19  | 84%                             | 27                    | low complexity, ALU, scRNA, hAT-Charlie | <i>RPS2</i>     | 1                          |
| 9377_1_hg19  | 96%                             | 25                    | MIR, hAT-Charlie                        | <i>PPP1R14B</i> | 1                          |
| 9473_1_hg19  | 59%                             | 76                    | L1                                      | <i>CCDC115</i>  | 1                          |
| 13085_1_hg19 | 90%                             | 48                    | ALU                                     | <i>NEK4</i>     | 1                          |
| 13250_1_hg19 | 94%                             | 48                    | L1, hAT-Charlie                         | <i>MARK2</i>    | 2                          |
| 15400_1_hg19 | 94%                             | 59                    | low complexity                          | <i>RPL13AP5</i> | 2                          |
| 15512_1_hg19 | 96%                             | 30                    | ALU, L1                                 | <i>FGFR1OP2</i> | 1                          |
| 16448_1_hg19 | 80%                             | 35                    | L1                                      | <i>GRK6</i>     | 3                          |
| 16458_1_hg19 | 79%                             | 37                    | ALU, ERVL-MaLR                          | <i>IPMK</i>     | 1                          |
| 17031_1_hg19 | 63%                             | 35                    | ERV1                                    | <i>XPO6</i>     | 1                          |
| 20403_1_hg19 | 55%                             | 31                    | ALU                                     | <i>IL6ST</i>    | 1                          |
| 23548_1_hg19 | 85%                             | 37                    | simple repeat, L2                       | <i>MTDH</i>     | 1                          |
| 24982_1_hg19 | 88%                             | 20                    | MIR                                     | <i>MCTS1</i>    | 0                          |
| 26859_1_hg19 | 86%                             | 17                    | ALU                                     | <i>FAM47E</i>   | 1                          |

**Table S12:** Row data of SNaPshot analysis.

| Sample                         | Peak area | A mat / G pat | ratio | G pat / A mat | ratio |
|--------------------------------|-----------|---------------|-------|---------------|-------|
| child Trio III DNA G allele    | 52038     | 0.40          | 1     | 2.47          | 1     |
| child Trio III DNA A allele    | 21063     |               |       |               |       |
| child Trio III cDNA G allele F | 14005     | 0.34          | 0.85  | 2.91          | 1.18  |
| child Trio III cDNA A allele F | 4816      |               |       |               |       |
| child Trio III cDNA G allele R | 22161     | 0.23          | 0.56  | 4.39          | 1.78  |
| child Trio III cDNA A allele R | 5048      |               |       |               |       |

## Interpretation of a Phred Quality Score:

| Phred Quality Score | Probability of incorrect base call | Base call accuracy |
|---------------------|------------------------------------|--------------------|
| 10                  | 1 in 10                            | 90%                |
| 20                  | 1 in 100                           | 99%                |
| 30                  | 1 in 1000                          | 99.9%              |
| 40                  | 1 in 10,000                        | 99.99%             |
| 50                  | 1 in 100,000                       | 99.999%            |
| 60                  | 1 in 1,000,000                     | 99.9999%           |

## Strategy of genomic primer design

1. Align all sequences of retrocopies using geneious (<http://www.geneious.com/>; last accessed 09.01.2016).
2. Download GenBank file of the region of interest including information of SNPs, repeats and exon-intron.-structure (<http://www.ensembl.org/>; last accessed 09.01.2016) and align to the alignment.
3. Design primers (length around 20bp) manually in regions where are mismatches between the sequences (3' sequence of the primer), and without a SNP inside the primer sequence.
4. Check primers by using the Human BLAT Search (<https://genome.ucsc.edu/cgi-bin/hgBlat?command=start>; last accessed 09.01.2016).
5. Check primer using UCSC In-Silico PCR ([https://genome.ucsc.edu/cgi-bin/hgPcr?hgsid=468504943\\_qb7OtRiFVIjXoCcd5pnKaAL842Mx](https://genome.ucsc.edu/cgi-bin/hgPcr?hgsid=468504943_qb7OtRiFVIjXoCcd5pnKaAL842Mx); last accessed 09.01.2016) for annealing temperature and single PCR product.
6. Check primer using bisearch (<http://bisearch.enzim.hu/?m=genompsearch>; last accessed 10.01.2016) for single PCR product.

## Strategy of bisulfit primer design

1. Align all bisulfit sequences of retrocopies using geneious (<http://www.geneious.com/>; last accessed 09.01.2016). For conversion of the genomic sequence to bisulfit we used <http://www.zymoresearch.com/tools/bisulfite-primer-seeker> (last accessed 10.01.2016)
2. Download GenBank file of the region of interest including information of SNPs, repeats and exon-intron.-structure (<http://www.ensembl.org/>; last accessed 09.01.2016) and align to the alignment.
3. Design primers (length around 25bp) manually or try to use MethPrimer (<http://www.urogene.org/cgi-bin/methprimer/methprimer.cgi>; last accessed 10.01.2016) in regions where are mismatches between the sequences (3' sequence of the primer), and without a SNP and CpG.dinucleotides inside the primer sequence.
4. Check primers by using the Human BLAT Search (<https://genome.ucsc.edu/cgi-bin/hgBlat?command=start>; last accessed 09.01.2016).
5. Check primer using UCSC In-Silico PCR ([https://genome.ucsc.edu/cgi-bin/hgPcr?hgsid=468504943\\_qb7OtRiFVIjXoCcd5pnKaAL842Mx](https://genome.ucsc.edu/cgi-bin/hgPcr?hgsid=468504943_qb7OtRiFVIjXoCcd5pnKaAL842Mx); last accessed 09.01.2016) for annealing temperature.
6. Check primer using bisearch (<http://bisearch.enzim.hu/?m=genompsearch>; last accessed 10.01.2016) for single PCR product.
